# Supplementary material
Source: PubMed Central journal article supplement (PMC2234114)

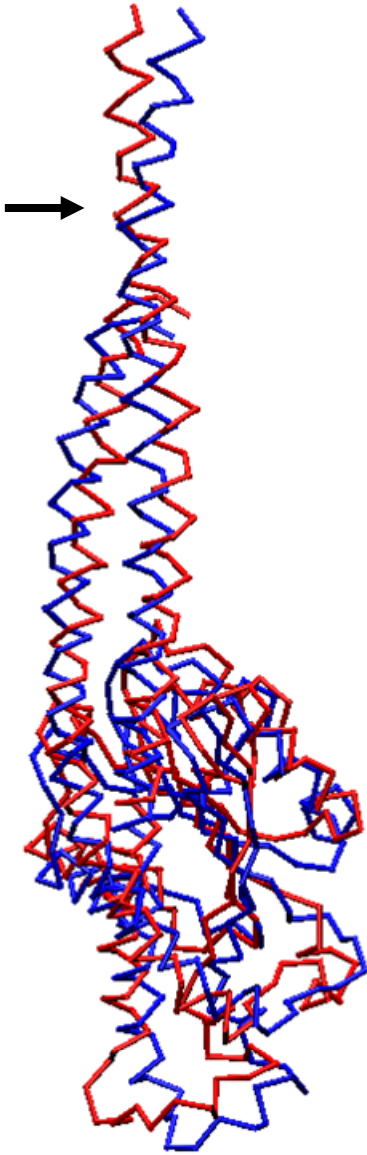

(a)

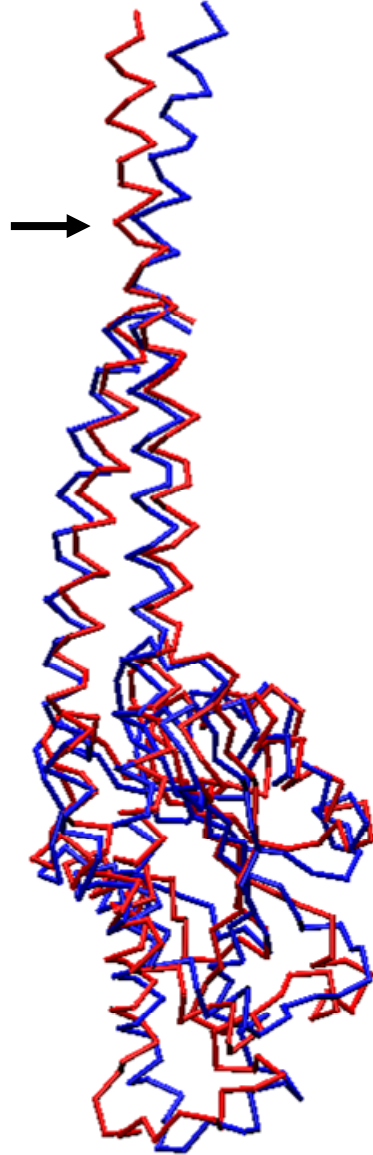

(b)

Supplement: pnas_0708746105_1.pdf [file pnas_0708746105_1.pdf]

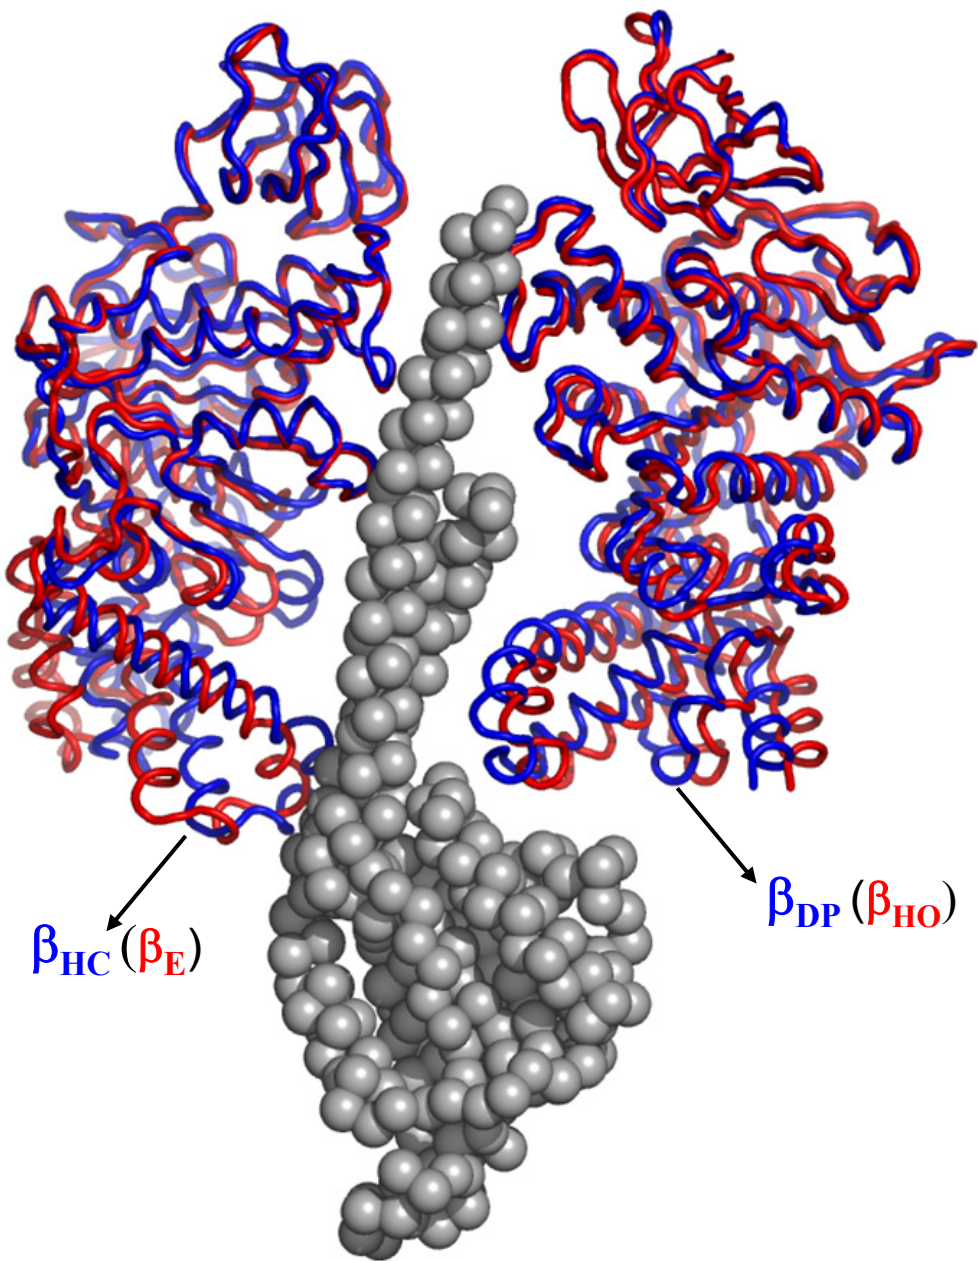

Supplement: pnas_0708746105_2.pdf [file pnas_0708746105_2.pdf]

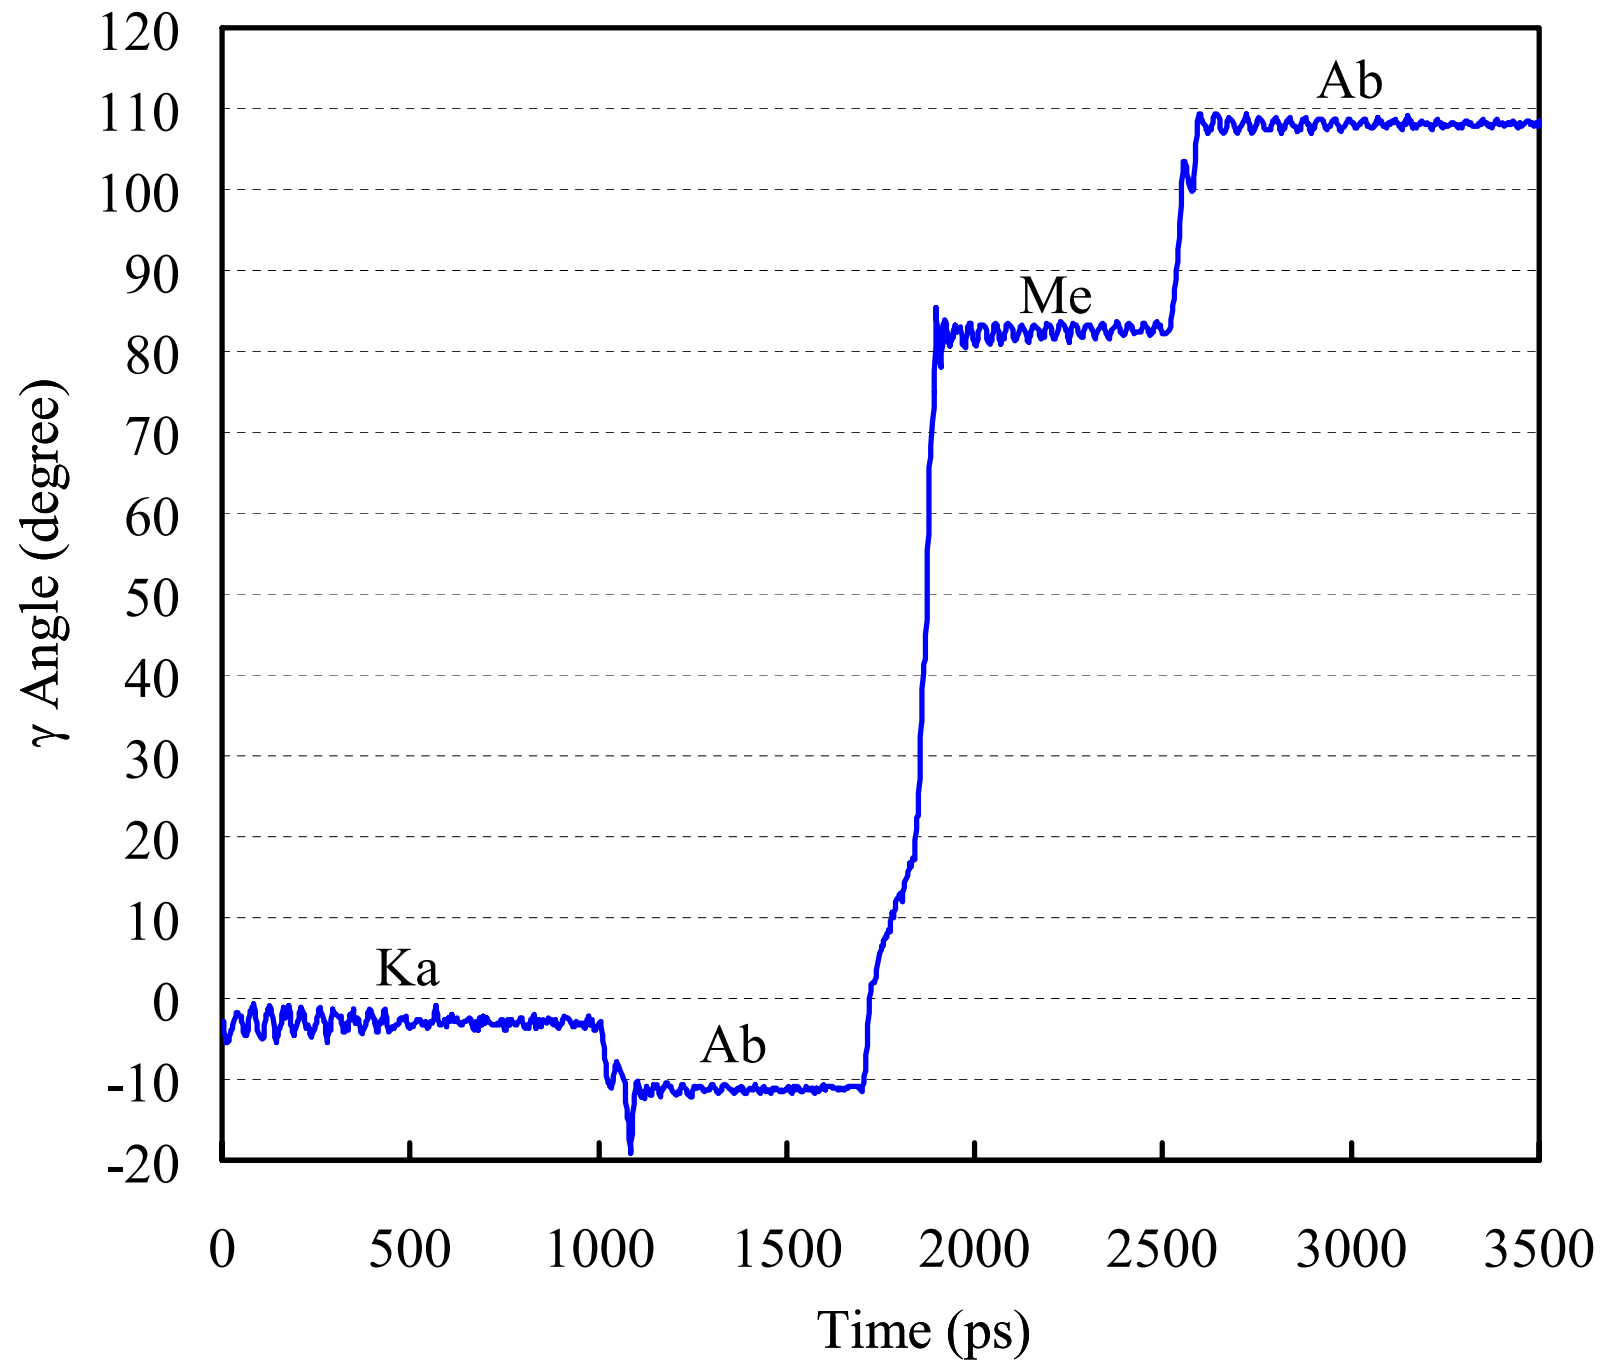

Supplement: pnas_0708746105_3.pdf [file pnas_0708746105_3.pdf]

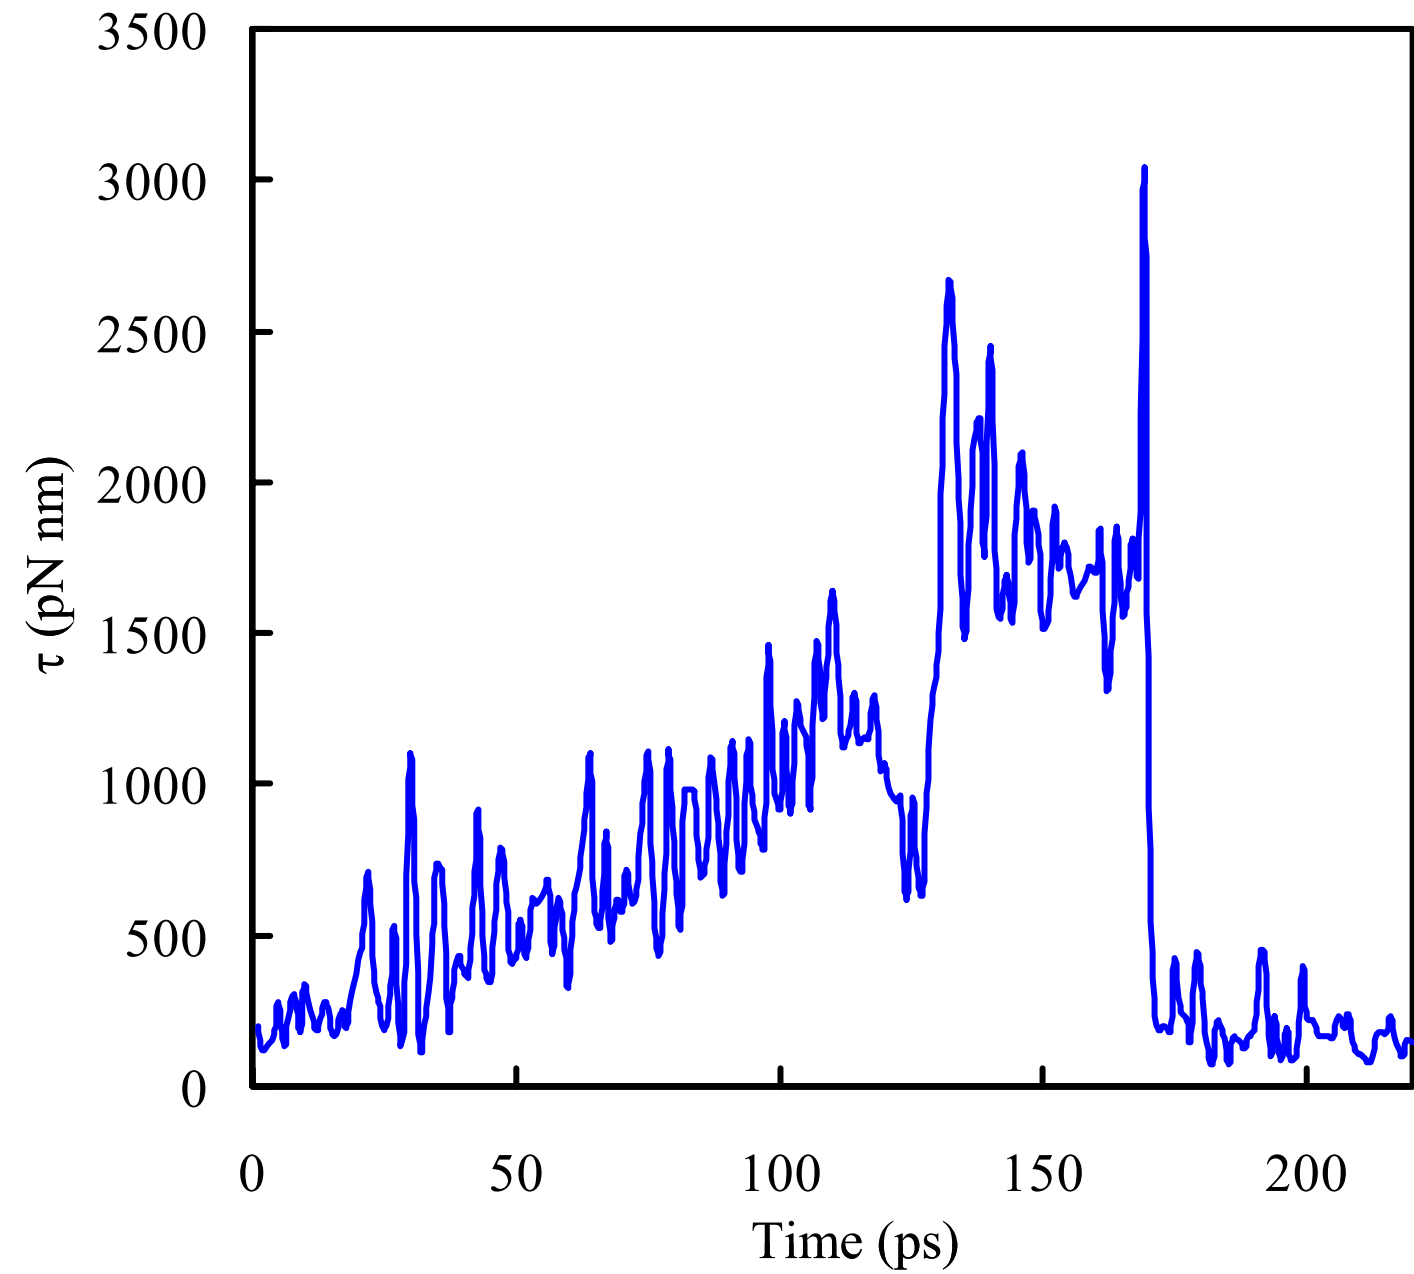

Supplement: pnas_0708746105_4.pdf [file pnas_0708746105_4.pdf]

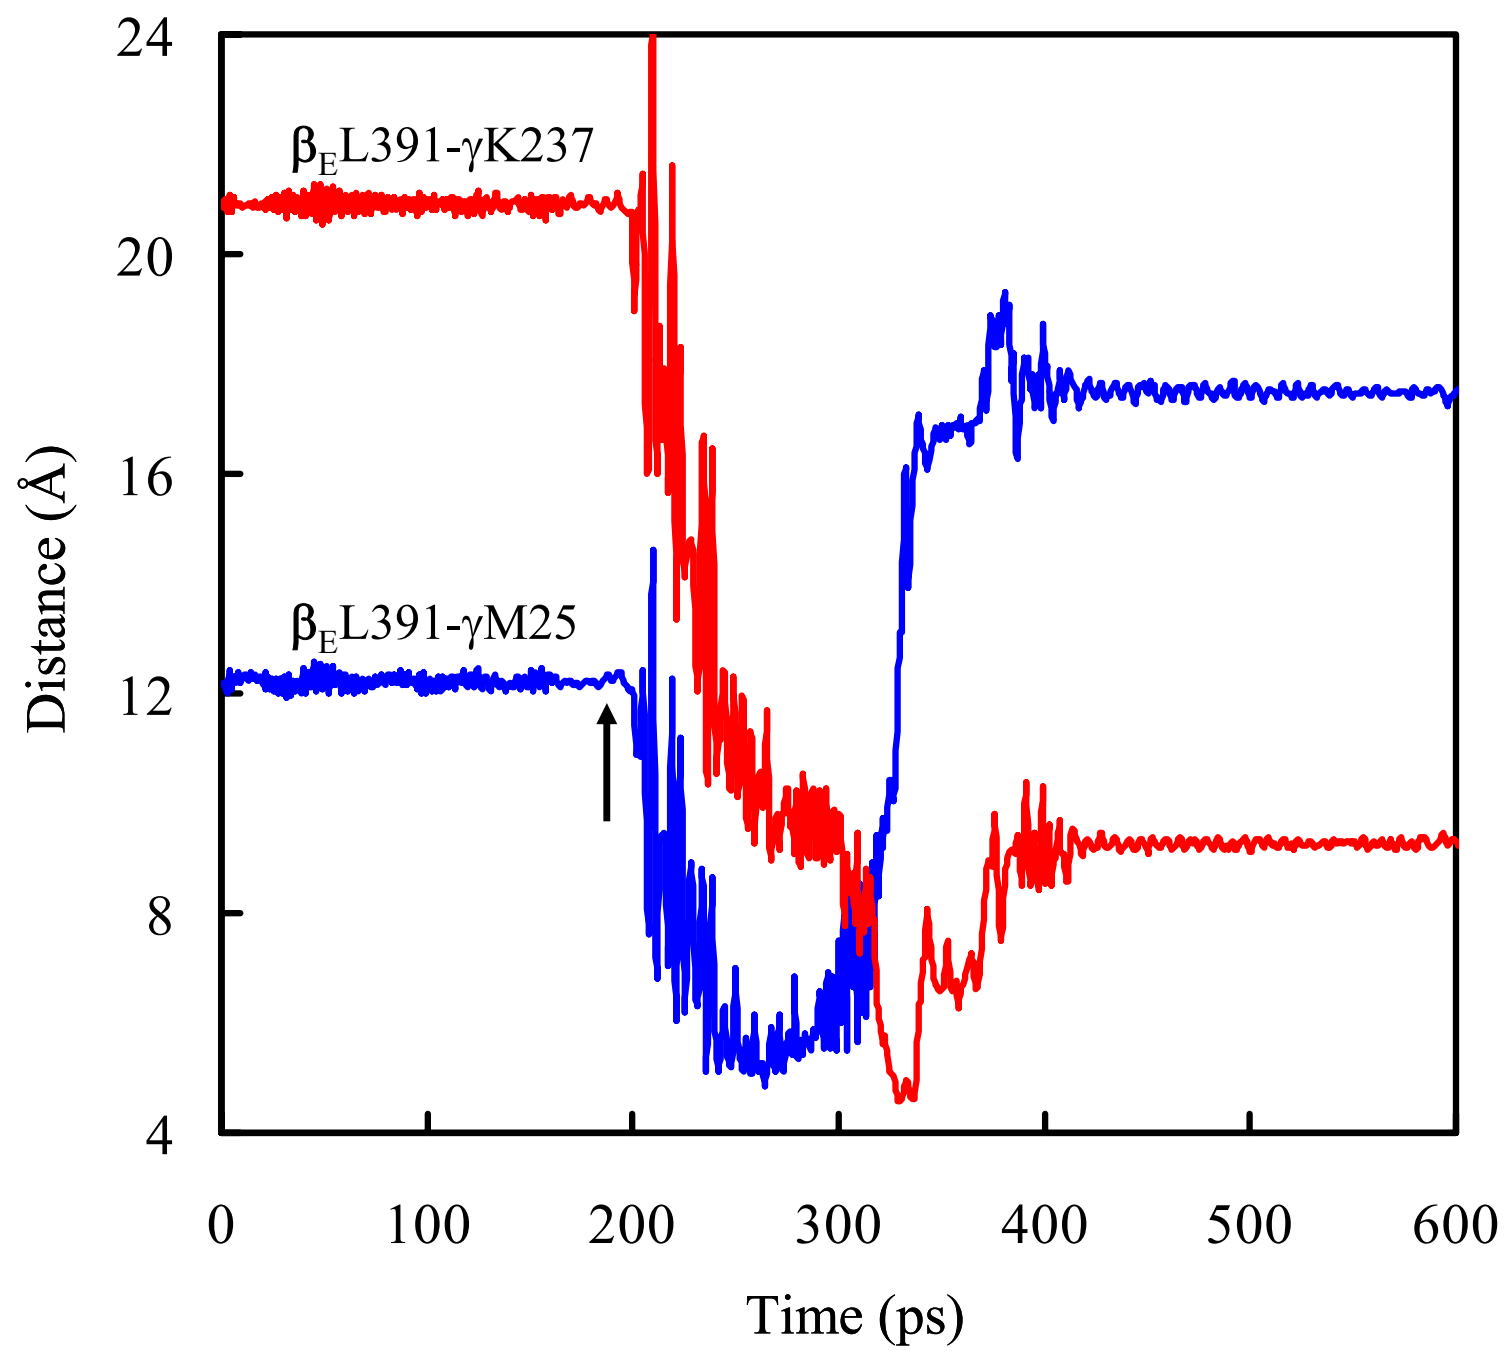

Supplement: pnas_0708746105_5.pdf [file pnas_0708746105_5.pdf]

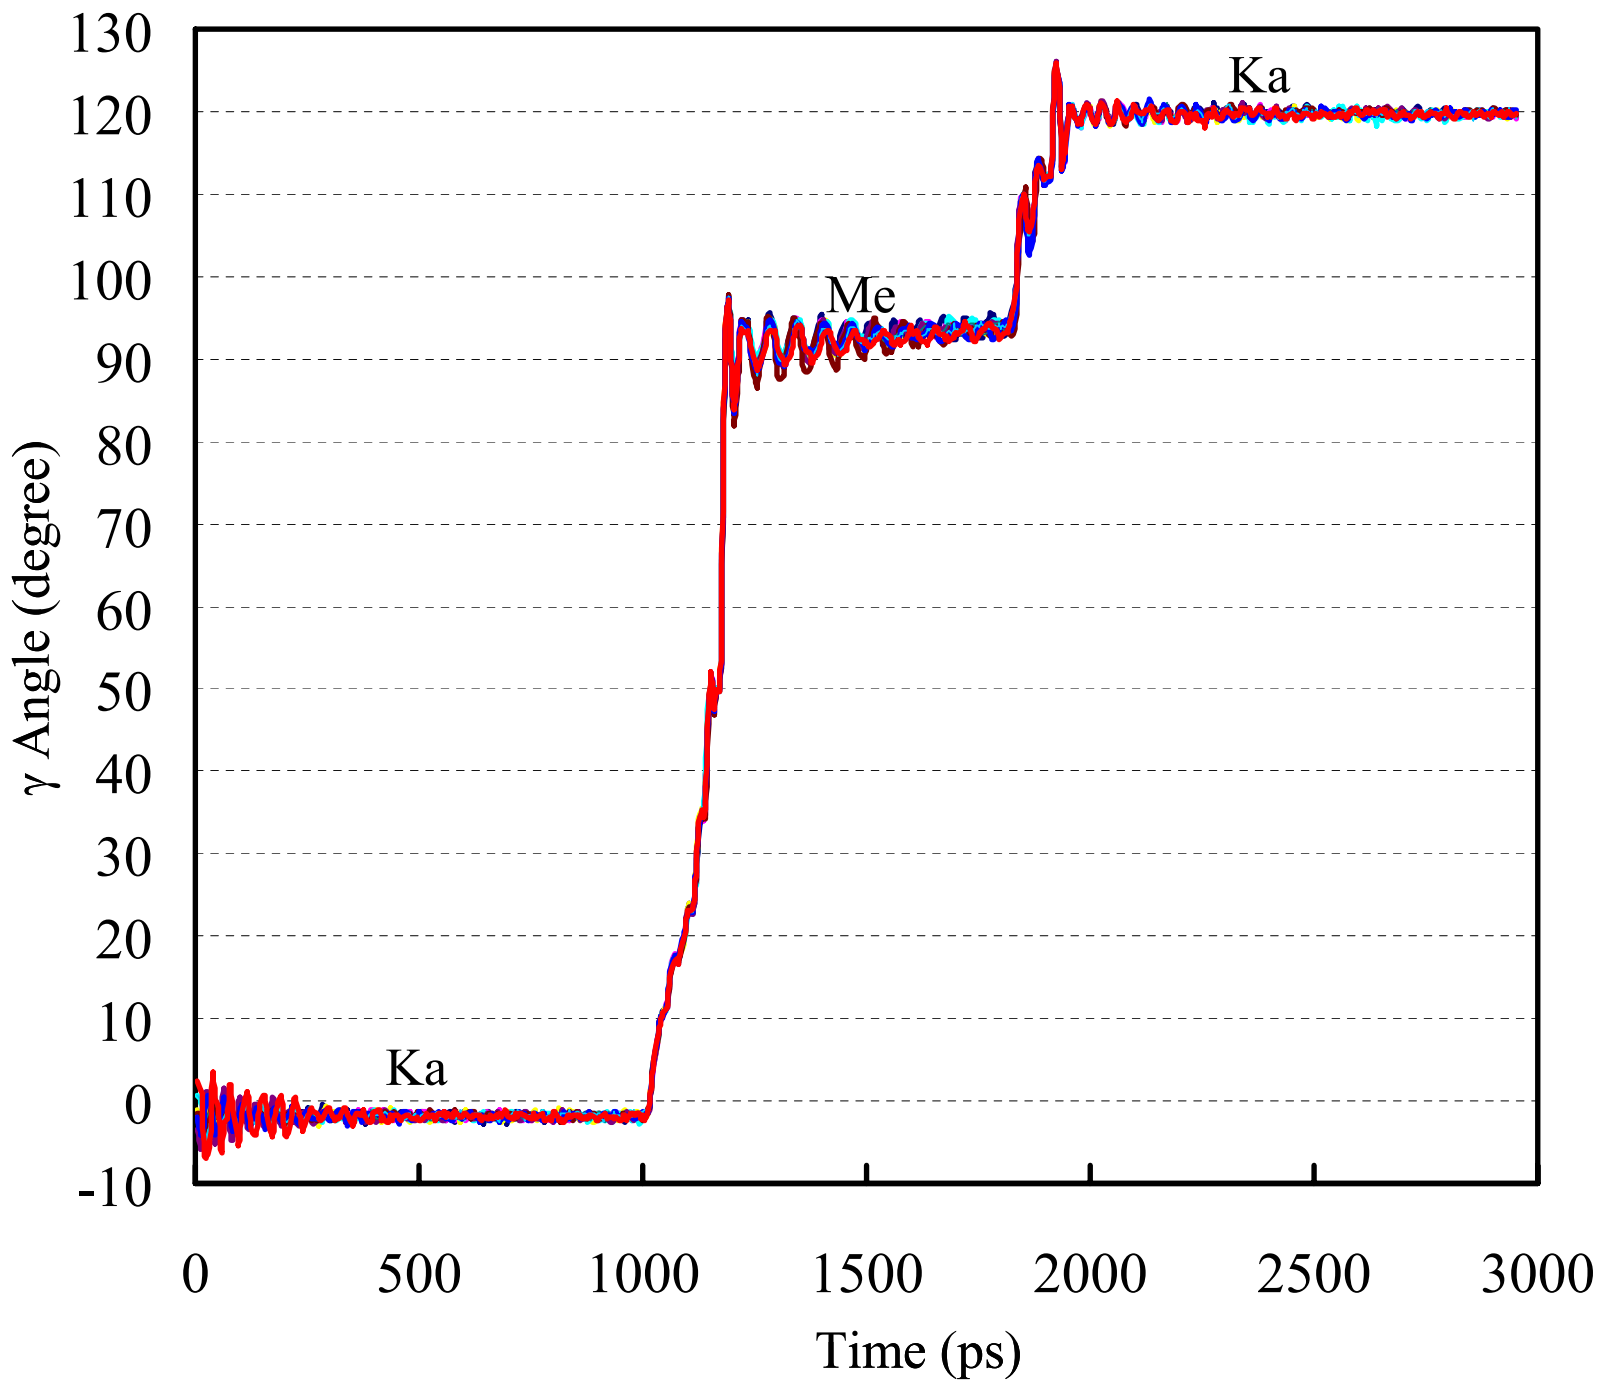

Supplement: pnas_0708746105_6.pdf [file pnas_0708746105_6.pdf]
